# Supplementary material
Source: publisher figshare collection journal article supplement (https://karger.figshare.com/ndownloader/files/23101241)
Supplement: Supplementary file 1 [file 23101241]

Supplementary Material 4

Antworten auf die offenen Fragen des „**F**ragebogen zur **E**valuation einer **K**urzform der **a**nwendungsorientierten **P**arcoursprüfung“ (Akronym: FEKaP)

**Prüfungskandidierende (**FEKaP-Pk)**:**

- "Beim theoretischen Teil hatte ich erwartet, dass ausschließlich fallbezogene Fragen kommen. Dann kamen aber auch einige generelle Fragen. Diese bitte auf den Fall bezogen formulieren oder noch klarer machen, dass auch generelles Fachwissen geprüft wird! Insgesamt aber eine sehr angenehme Prüfung. Und interessant!"
- "Es war sehr schade zum Seminar \"Zwangsstörungen\" nur einen kleinen Teilbereich befragt zu werden, da dadurch vom Prüfling wenig Gelerntes berichtet werden konnte."
- "Paxisnähe geht durch die wenigen Informationen zum Patienten etwas verloren, sonst sehr gut."
- "sehr angenehmes Klima, man vergisst irgendwann, dass man gerade in einer Prüfungssituation ist"
- "sehr, sehr wertschätzende, ermutigende Prüfer. Es hat Spaß gemacht!"
- "Super Prüfungsformat. Sehr wertvoll sich mal auf so eine Art vorzubereiten und dann einem \"Patienten\" gegenüber zu sitzen. Zeit fast zu knapp; wäre entstressender wenn mehr Zeit für Teil 2 (10 min Theorie, 25 min Praxis)"

**Prüfende (**FEKaP-P)

- "Aufgrund eines Sprachproblems gestaltete sich diese Prüfung schwierige als die anderen."
- "Dies war eine perfekte Prüfung., hätte eigentlich mit 0,7 bewertet werden müssen."
- "Im Vergleich zur vorherigen Prüfung war der Teil 2 etwas schlechter (weniger authentisch, größerer Redeanteil), jedoch für das Ausbildungsniveau (Master) dennoch mit 1,0 zu bewerten"
- "wählte 2 x Moderne Verfahren, weshalb sie zu DBT und CBASP direkt nacheinander im Parcours geprüft wurde, was sehr anspruchsvoll ist."

**Simulationspatientin (**FEKaP-S)

- "fühlte mich stark überrannt, gab mir \"meine Geschichte\" vor, ließ sich gar nicht reden, fühlte mich nicht wahrgenommen"
- "führte mich sehr einfühlsam und als gutes Modell (zeigte mir alles vorher) durch die Übung"
- "jederzeit auf mich eingegangen, flexibel im Umgang, schwierige Situation souverän und mit sehr authentischer Art gemeistert"
- "Prüfling hat mich gut angeleitet und war aktiv mit mir in der Übung; Prüfling war jedoch sehr auf Übung und deren genaue Abfolge konzentriert; ich fühlte mich in meiner Anspannung und meinen Gefühlen nicht ganz wahrgenommen"
- "Prüfling hat mir ein bisschen zu viel theoretisch erklärt, habe mich ein bisschen überladen gefühlt"
- "Prüfling sehr ans Lehrskript (Lehrvideo) gehalten, wo Situation unpassend war; passte nicht ganz zu meiner Empfindung/Darstellung -> bisschen zuviel auswendig Gelerntes präsentiert (etwas unflexibel im Kontakt zu mir als Patient)"
- "Prüfung hatte im Kontakt sehr großen Redeanteil, der ein wenig unauthentisch (auswendig gelernt) wirkte; der Kontakt litt darunter"
- "sehr \"hart\" geblieben bei meinen Vermeidungsversuchen in der Expo, mich gut hingeführt wozu wir das machen"
- "sehr aufmerksam mir gegenüber und hilfreiche Begleiter durch die Übung"
- "sehr empathischer, fürsorglicher Umgang"
